# Supplementary material for: Synthesis of dual AChE/5-HT4 receptor multi-target directed ligands
Source: Royal Society of Chemistry journal article supplement (doi:10.1039/c2md20063e), 2012-01-01
Supplement: c2md20063e.pdf [file c2md20063e.pdf]

# Synthesis of Dual AChE /5-HT<sub>4</sub> Receptors Multi-Target Directed Ligands.

Cédric Lecoutey,<sup>a</sup> Christophe Rochais,<sup>a</sup> David Genest,<sup>a</sup> Sabrina Butt-Gueulle,<sup>a</sup> Céline Ballandonne,<sup>a</sup> Sophie Corvaisier,<sup>a</sup> Fabienne Dulin,<sup>a</sup> Alban Lepailleur,<sup>a</sup> Jana Sopkova-de Oliveira Santos<sup>a</sup> and Patrick Dallemagne,<sup>a\*</sup>

Received (in XXX, XXX) Xth XXXXXXXXXX 20XX, Accepted Xth XXXXXXXXXX 20XX

DOI: 10.1039/b000000x

## Supporting Information

10

### Experimental section

#### 1. General

Melting points were determined on a Kofler melting point apparatus and are uncorrected. IR spectra were recorded on a Perkin Elmer BX FT-IR apparatus using KBr pellets. The <sup>1</sup>H (400 MHz) and <sup>13</sup>C (100 MHz) NMR spectra were obtained on a Jeol Lambda 400 spectrometer using DMSO-d<sub>6</sub> or CDCl<sub>3</sub> as solvent and TMS as internal standard. The chemical shifts (δ) are reported in ppm, and the coupling constants are in Hertz. Reactions were monitored by LC/MS and stopped when all starting material had disappeared. LC/MS (ESI) analyses were realised with a Waters alliance 2695 as separating module using the following gradient: A (95%)/B (5%) to A (5%)/B (95%) in 10 min. This ratio was hold for 3 min before return to initial conditions in 1 min. Initial conditions were then maintained for 5 min (A: H<sub>2</sub>O, B: CH<sub>3</sub>CN; each containing HCOOH: 0.1%; Column: C18 Xterra MSC118/2.1\_50 mm). MS detection was performed with a Micromass ZMD 2000 by positive ESI. High-resolution mass spectra (EIMS) were obtained using a Jeol JMS GCMate spectrometer. For compounds **5a**, **5b**, **4b** and **15b**, high- resolution mass spectra were performed at 70 eV by electronic impact. Reactions were monitored by thin-layer chromatography (TLC) using 0.2 mm Polygram Sil silica gel G/UV 254 precoated plates with visualisation by irradiation with a short-wavelength UV light. Silica gel flash chromatography was performed using 63-200 mM Kieselgel Merck 60 silica gel. The microwave reactions were performed using a biotage initiator microwave oven using 2-5 mL sealed vials.

#### 2. Chemistry

##### 2.1. Reaction of deprotection

###### 5-[(Piperidin-4-yl)methoxy]pyrrolo[1,2-*a*]thieno[2,3-*e*] pyrazine (**5a**).

General procedure: 420 mg (0.11 mmol) of compound **4a** are stirred in 4 mL of a binary solution of CH<sub>2</sub>Cl<sub>2</sub>/CF<sub>3</sub>COOH (1/1) at room temperature. After 1 hour, the mixture is neutralised with a saturated solution of NaHCO<sub>3</sub>. The organic phase is separated and washed with a saturated solution of sodium hydrogenocarbonate and twice with water. The organic phase is then dried over MgSO<sub>4</sub> and concentrated in vacuum to afford the product **5a** as a beige solid. Yield: 85%. MP: 118°C. IR (cm<sup>-1</sup>): 3427.8, 2918.4, 2849.9, 1635.8, 1520.4, 1493.7, 1423.5, 1359.0, 1335.8, 1302.0, 1263.4, 1117.7, 735.0, 617.5. HREIMS (m/z [M+H]<sup>+</sup>): 288.1171 (calc: 288.1158). <sup>1</sup>H NMR (CDCl<sub>3</sub>) δ: 7.40 (d, *J* = 2.9 Hz, 1H), 7.26 (d, *J* = 4.9 Hz, 1H), 7.03 (d, *J* = 4.9 Hz, 1H), 6.92 (d, *J* = 3.9 Hz, 1H), 6.78 (m, 1H), 4.36 (d, *J* = 6.8 Hz, 2H, CH<sub>2</sub>O), 3.16 (m, 2H, 2 CHN), 2.69 (m, 2H, 2 CHN), 2.06 (m, 1H, CH), 1.89 (m, 2H, 2 CH), 1.37 (m, 2H, 2 CH). <sup>13</sup>C NMR (CDCl<sub>3</sub>) δ: 155.6, 136.1, 124.5, 124.3, 119.5, 115.6, 114.5, 113.2, 104.3, 70.6, 46.3 (2C), 36.1, 30.3 (2C). LC-MS (ESI): t<sub>R</sub>=7.57min; m/z [M+H]<sup>+</sup>: 288.15.

###### 5-[(Piperidin-4-yl)methoxy]-1-methylpyrrolo[1,2-*a*]thieno [3,2-*e*]pyrazine (**5b**).

Using the same procedure described for **5a** and starting from a solution of 127 mg (0.32 mmol) of **4b** in 4 mL of a binary solution of CH<sub>2</sub>Cl<sub>2</sub>/CF<sub>3</sub>COOH (1/1), 87 mg of **5b** were obtained as a beige solid. Yield: 92%. MP: 102°C. IR (cm<sup>-1</sup>): 3410.7, 3097.3, 2936.0, 2851.1, 1587.1, 1555.6, 1529.4, 1516.1, 1487.4, 1430.1, 1351.4, 1299.9, 1165.7, 1127.8, 715.8. HREIMS (m/z [M+H]<sup>+</sup>): 302.1327 (calc: 302.1326). <sup>1</sup>H NMR (CDCl<sub>3</sub>) δ: 7.87 (s, 1H), 6.91 (d, *J* = 3.9 Hz, 1H), 6.77 (s, 1H), 6.74 (m, 1H), 4.34 (d, *J* = 5.8 Hz, 2H, CH<sub>2</sub>O), 3.19 (m, 2H, 2 CHN), 2.71 (m, 2H, 2 CHN), 2.67 (s, 3H, CH<sub>3</sub>), 2.04 (m, 1H, CH), 1.89 (m, 2H, 2 CH), 1.40 (m, 2H, 2 CH). <sup>13</sup>C NMR (CDCl<sub>3</sub>) δ: 154.6, 140.2, 125.2, 122.8, 119.6, 115.2, 114.9, 112.2, 103.6, 70.5, 51.9, 46.0 (2C), 35.8, 29.7 (2C), 17.2. LC-MS (ESI): t<sub>R</sub>=7.89min; m/z [M+H]<sup>+</sup>: 302.18.

##### 2.2. Reaction of *O*-Arylation

###### 5-[1-*t*-Butyloxycarbonyl(piperidin-4-yl)methoxy]pyrrolo [1,2-*a*]thieno[2,3-*e*]pyrazine (**4a**).

50

General procedure: At 0°C, 262 mg of NaH 60% (6.56 mmol, 4.5 eq) are added to a solution of 470 mg of *N*-BOC-piperidin-4-yl methanol (2.19 mmol, 1.5 eq) in 5 mL of DMF. The mixture is stirred at room temperature for 45 minutes. 470 mg of **3a** (1.46 mmol, 1 eq) are then added and the mixture is stirred until the starting material has disappeared (2 h). 50 mL of water are added at 0°C to neutralise the excess of NaH and the solution is extracted with CH<sub>2</sub>Cl<sub>2</sub> (3 X 40 mL). The organic phase is then washed with water (5 X 50 mL), dried over MgSO<sub>4</sub> and concentrated under reduced pressure. The crude product is purified by SiO<sub>2</sub> column chromatography (preparation: CH<sub>2</sub>Cl<sub>2</sub>, gradient: CH<sub>2</sub>Cl<sub>2</sub> then CH<sub>2</sub>Cl<sub>2</sub>/AcOEt (8/2)). Yield: 83%. MP: 128°C. IR (cm<sup>-1</sup>): 3115.6, 3060.9, 2976.0, 2933.7, 2866.3, 1697.2, 1582.6, 1502.0, 1493.6, 1422.1, 1352.2, 1305.8, 1245.6, 1166.1, 1143.4, 1089.9, 980.0, 731.9. HRMS (m/z): 387.16183 (calc: 386.16164). <sup>1</sup>H NMR (CDCl<sub>3</sub>) δ: 7.41 (s, 1H), 7.25 (d, *J* = 5.9 Hz, 1H), 7.04 (d, *J* = 5.9 Hz, 1H, H<sub>2</sub>), 6.91 (d, *J* = 3.9 Hz, 1H), 6.79 (m, 1H), 4.38 (d, *J* = 5.9 Hz, 2H, CH<sub>2</sub>O), 4.15 (m, 2H, 2 CHN), 2.78 (m, 2H, 2 CHN), 2.08 (m, 1H, CH), 1.87 (m, 2H, 2 CH), 1.47 (s, 9H, 3 CH<sub>3</sub>), 1.36 (m, 2H, 2 CH). <sup>13</sup>C NMR (CDCl<sub>3</sub>) δ: 155.4, 154.8, 136.1; 124.4, 124.3, 119.4, 115.7, 114.6, 113.2, 104.3, 79.3, 69.9 (2C), 43.6, 35.8 (2C), 28.9; 28.4 (3C). LC-MS (ESI): t<sub>R</sub>=13.57min; m/z [M+H]<sup>+</sup>: 388.43.

#### 5-[1-*t*-Butyloxycarbonyl(piperidin-4-yl)methoxy]-1-methyl pyrrolo[1,2-*a*]thieno[3,2-*e*]pyrazine (**4b**).

Using the same procedure described for **4a** and starting with the formation of the alkoxide from 200 mg of *N*-BOC-piperidin-4-yl methanol (0.93 mmol, 1.3 eq) and 112 mg (2.79 mmol, 3.9 eq) of NaH 60% in 3 mL of DMF followed by the *O*-arylation on 159 mg of the compound **3b** (0.71 mmol, 1 eq), 252 mg of **4b** were obtained as a beige solid (purification: SiO<sub>2</sub>, preparation: CH<sub>2</sub>Cl<sub>2</sub>, eluent: CH<sub>2</sub>Cl<sub>2</sub> then CH<sub>2</sub>Cl<sub>2</sub>/AcOEt (8/2)). Yield: 68%. MP: 112°C. IR (cm<sup>-1</sup>): 2975.4, 2945.3, 2926.1, 2869.0, 1699.0, 1587.9, 1531.8, 1517.1, 1488.0, 1461.5, 1428.8, 1346.9, 1300.7, 1246.5, 1162.1, 1144.4, 1126.5, 1085.6, 979.6, 723.7, 707.7. HREIMS (m/z [M+H]<sup>+</sup>): 402.1851 (calc: 402.1862). <sup>1</sup>H NMR (CDCl<sub>3</sub>) δ: 7.88 (s, 1H), 6.90 (d, *J* = 3.9 Hz, 1H), 6.78 (s, 1H), 6.74 (m, 1H), 4.36 (d, *J* = 5.8 Hz, 2H, CH<sub>2</sub>O), 4.13 (m, 2H, 2 CHN), 2.68 (s, 3H, CH<sub>3</sub>), 2.77 (m, 2H, 2 CHN), 2.68 (s, 3H, CH<sub>3</sub>), 2.06 (m, 1H, CH), 1.86 (m, 2H, 2 CH), 1.47 (s, 9H, 3 CH<sub>3</sub>), 1.33 (m, 2H, 2 CH). <sup>13</sup>C NMR (CDCl<sub>3</sub>) δ: 154.8, 154.4, 140.1, 125.2, 122.8, 119.6, 115.2, 114.9, 112.2, 103.5, 79.3, 70.0 (2C), 43.6, 35.8 (2C), 28.8; 28.4 (3C), 17.2. LC-MS (ESI): t<sub>R</sub>=14.44min; m/z [M+H]<sup>+</sup>: 402.24.

#### 5-[(1-(2-Fluorobenzyl)piperidin-4-yl)methoxy]pyrrolo[1,2-*a*]thieno[2,3-*e*]pyrazine (**16a**).

Using the same procedure described for **4a** and starting with the formation of the alkoxide at 80°C for 1 h from 450 mg of (1-(2-fluorobenzyl)piperidin-4-yl)methanol (1.70 mmol, 1.5 eq) and 204 mg of NaH 60% (5.09 mmol, 4.5 eq) in 10 mL of toluene followed by the *O*-arylation on 235 mg of compound **3a** (1.13 mmol, 1 eq) at 80°C overnight, 135 mg of **16a** were obtained as a yellow oil (purification: SiO<sub>2</sub>, preparation: cyclohexane, gradient: from cyclohexane to cyclohexane/AcOEt (1/1)). Yield: 30%. IR (cm<sup>-1</sup>): 2934.6, 1585.0, 1521.5, 1493.2, 1422.5, 1357.5; 1335.6, 1225.7, 1150.1, 982.0, 752.8, 732.3. HRMS (m/z): 395.14757 (calc: 395.14674). <sup>1</sup>H NMR (CDCl<sub>3</sub>) δ: 7.40 (m, 2H), 7.25 (m, 2H), 7.11 (m, 1H), 7.03 (m, 1H), 7.03 (d, *J* = 5.9 Hz, 1H), 6.90 (d, *J* = 3.9 Hz, 1H), 6.78 (m, 1H), 4.36 (d, *J* = 6.8 Hz, 2H, CH<sub>2</sub>O), 3.61 (s, 2H, CH<sub>2</sub>N), 2.97 (m, 2H, 2 CHN), 2.10 (m, 2H, 2 CHN), 1.89 (m, 3H), 1.47 (m, 2H, 2 CH). <sup>13</sup>C NMR (CDCl<sub>3</sub>) δ: 161.4 (d, *J* = 246.2 Hz), 155.6, 136.2, 131.6 (d, *J* = 59.0 Hz), 128.6 (d, *J* = 8.3 Hz), 124.9 (d, *J* = 14.9 Hz), 124.5, 124.3, 119.5, 115.6, 115.2 (d, *J* = 22.3 Hz), 114.5, 113.2, 104.3, 70.3, 55.6, 53.1 (2C), 35.5, 29.1 (2C). LC-MS (ESI): t<sub>R</sub>=8.47min; m/z [M+H]<sup>+</sup>: 396.48.

#### 5-[(1-(4-Methoxybenzyl)piperidin-4-yl)methoxy]pyrrolo [1,2-*a*]thieno[2,3-*e*]pyrazine (**17a**).

Using the same procedure described for **4a** and starting with the formation of the alkoxide at 80°C for 1 h from 1 g of (1-(4-methoxybenzyl)piperidin-4-yl)methanol (4.26 mmol, 1.5 eq) and 306 mg of NaH 60% (12.77mmol, 4.5 eq) in 30 mL of toluene followed by the *O*-arylation on 590 mg of compound **3a** (2.84 mmol, 1 eq) at 80°C overnight, 382 mg of **17a** were obtained as a brown solid (purification: SiO<sub>2</sub>, preparation: CH<sub>2</sub>Cl<sub>2</sub>, gradient: from CH<sub>2</sub>Cl<sub>2</sub> to CH<sub>2</sub>Cl<sub>2</sub>/AcOEt (2/3)). Yield: 33%. MP: 128°C. IR (cm<sup>-1</sup>): 2925.1, 2794.0, 2754.1, 1609.3, 1581.8, 1515.9, 1493.3, 1419.8, 1331.9, 1301.7, 1243.0, 1146.1, 979.5, 828.4, 730.1, 637.3. HRMS (m/z): 407.16859 (calc: 407.16673). <sup>1</sup>H NMR (CDCl<sub>3</sub>) δ: 7.39 (s, 1H), 7.24 (m, 3H), 7.03 (d, *J* = 5.8 Hz, 1H), 6.91 (d, *J* = 3.8 Hz, 1H), 6.86 (d, *J* = 8.8 Hz, 2H), 6.78 (m, 1H), 4.36 (d, *J* = 6.8 Hz, 2H, CH<sub>2</sub>O), 3.80 (s, 3H, CH<sub>3</sub>O), 3.46 (s, 2H, CH<sub>2</sub>N), 2.93 (m, 2H, 2 CHN), 2.03 - 1.85 (m, 5H), 1.47 (m, 2H, 2 CH). <sup>13</sup>C NMR (CDCl<sub>3</sub>) δ: 158.6, 155.6, 136.2, 130.4, 130.4 (2C), 124.5, 124.3, 119.5, 115.6, 114.5, 113.5 (2C), 113.2, 104.3, 70.4, 62.8, 55.2, 53.2 (2C), 35.7, 29.1 (2C). LC-MS (ESI): t<sub>R</sub>=8.69min; m/z [M+H]<sup>+</sup>: 408.24.

#### 5-[(1-Benzylpiperidin-4-yl)oxy]pyrrolo[1,2-*a*]thieno[2,3-*e*] pyrazine (**18a**).

Using the same procedure described for **4a** and starting with the formation of the alkoxide at room temperature from 150 mg of 1-benzyl-4-hydroxypiperidine (0.78 mmol, 1.5 eq) and 94 mg of NaH 60% (2.36 mmol, 4.5 eq) in 5 mL of DMF for 45 min followed by the *O*-arylation on 109 mg of compound **3a** (0.52 mmol, 1 eq), 108 mg of **18a** were obtained as a brown oil (purification: SiO<sub>2</sub>, preparation: CH<sub>2</sub>Cl<sub>2</sub> + Et<sub>3</sub>N (2%), eluent: CH<sub>2</sub>Cl<sub>2</sub> then CH<sub>2</sub>Cl<sub>2</sub>/AcOEt (9/1)). Yield: 57%. IR (cm<sup>-1</sup>): 2925.2, 2854.2, 2804.7, 1582.0, 1518.1, 1492.5, 1420.1, 1357.5, 1335.4, 1151.6, 1035.4, 733.0, 699.9. HRMS (m/z): 363.14052 (calc: 363.14115). <sup>1</sup>H NMR (CDCl<sub>3</sub>) δ: 7.39-7.28 (m, 6H), 7.23 (d, *J* = 5.9 Hz, 1H), 7.02 (d, *J* = 5.9 Hz, 1H), 6.91 (d, *J* = 2.9 Hz, 1H), 6.78 (dd, *J* = 3.9 Hz, *J* = 2.9 Hz, 1H), 5.42-5.36 (m, 1H, CH-O), 3.57 (s, 2H, CH<sub>2</sub>N), 2.79-2.75 (m, 2H, 2 CHN), 2.44 - 2.40 (m, 2H, 2 CHN), 2.15 - 2.09 (m, 2H, 2 CH), 1.99 - 1.91 (m, 2H, 2 CH). <sup>13</sup>C NMR (CDCl<sub>3</sub>) δ: 154.6, 138.4, 136.3, 129.1 (2C), 128.2 (2C), 127.0, 124.5, 124.1, 119.8, 115.5, 114.4, 113.1, 104.3, 70.6, 63.1 (2C), 50.7, 30.9 (2C). LC-MS (ESI): t<sub>R</sub>=8.22min; m/z [M+H]<sup>+</sup>: 363.86.

### 5-[(1-Benzylpiperidin-4-yl)ethoxy]pyrrolo[1,2-*a*]thieno[2,3-*e*]pyrazine (**19a**).

Using the same procedure described for **4a** and starting with the formation of the alkoxide at room temperature from 128 mg of 1-benzyl-4-ethoxypiperidine (0.58 mmol, 1.5 eq) and 70 mg of NaH 60% (1.75 mmol, 4.5 eq) in 5 mL of DMF for 45 min followed by the *O*-arylation on 81 mg of compound **3a** (0.39 mmol, 1 eq) at room temperature for 2 h, 52 mg of **19a** were obtained as a colourless oil (purification: SiO<sub>2</sub>, preparation: CH<sub>2</sub>Cl<sub>2</sub> + Et<sub>3</sub>N (2%), eluent: CH<sub>2</sub>Cl<sub>2</sub> then CH<sub>2</sub>Cl<sub>2</sub>/AcOEt (9/1)). Yield: 34%. IR (cm<sup>-1</sup>): 2920.4, 1520.9, 1493.7, 1422.1, 1363.2, 1335.3, 1150.5, 974.3, 732.9, 699.8. HRMS (m/z): 391.17130 (calc: 391.17182). <sup>1</sup>H NMR (CDCl<sub>3</sub>) δ: 7.40 (d, *J* = 2.9 Hz, 1H), 7.31 (m, 3H), 7.25 (m, 3H), 7.03 (d, *J* = 5.8 Hz, 1H), 6.90 (d, *J* = 2.9 Hz, 1H), 6.78 (m, 1H), 4.54 (t, *J* = 6.8 Hz, 2H, CH<sub>2</sub>O), 3.49 (s, 2H, 2 CHN), 2.89 (m, 2H, 2 CHN), 1.95 (m, 2H, 2 CH), 1.82 (qd, *J* = 6.8 Hz, 2H, CH<sub>2</sub>), 1.78 (m, 2H, 2 CH), 1.56 (m, 1H, CH), 1.37 (m, 2H, 2 CH). <sup>13</sup>C NMR (CDCl<sub>3</sub>) δ: 155.5, 137.8, 136.2, 129.4 (2C), 128.2 (2C), 127.1, 124.5, 124.3, 119.6, 115.6, 114.5, 113.1, 104.3, 64.0, 63.3, 53.7 (2C), 35.4, 32.9, 32.1 (2C). LC-MS (ESI): t<sub>R</sub>=8.75min; m/z [M+H]<sup>+</sup>: 392.13.

### 2.3. Reaction of *N*-alkylation

#### 5-[(1-(3-Fluorobenzyl)piperidin-4-yl)methoxy]pyrrolo[1,2-*a*]thieno[2,3-*e*]pyrazine (**6a**).

General procedure: To a solution of 64 mg (0.22 mmol) of **5a** in DMF (5 mL) are added 40 mg (0.29 mmol, 1.3 eq) of K<sub>2</sub>CO<sub>3</sub>, 37 mg (0.22 mmol, 1 eq) of KI and 32 μL (0.27 mmol, 1.2 eq) of 3-fluorobenzyl chloride. The mixture is then warmed to 110°C for 1 hour. After cooling, the resulting solution is diluted in water and extracted with CH<sub>2</sub>Cl<sub>2</sub> (3 X 50 mL). The organic phase is then washed with water (5 X 60 mL), dried over MgSO<sub>4</sub> and evaporated in vacuo. The crude product is purified by flash chromatography (SiO<sub>2</sub>, preparation: CH<sub>2</sub>Cl<sub>2</sub> + Et<sub>3</sub>N (2%), eluent: CH<sub>2</sub>Cl<sub>2</sub>) to obtain 72 mg of compound **6a** as a yellow oil. Yield: 82%. IR (cm<sup>-1</sup>): 2933.1, 2881.9, 2801.1, 2759.2, 1587.8, 1521.8, 1493.7, 1422.8, 1335.7; 1300.7; 1150.2, 983.4; 732.3. HRMS (m/z): 395.14627 (calc: 395.14674). <sup>1</sup>H NMR (CDCl<sub>3</sub>) δ: 7.40 (s, 1H), 7.26 (m, 2H), 7.09 (m, 2H), 7.03 (d, *J* = 5.9 Hz, 1H), 6.93 (m, 2H), 6.78 (m, 1H), 4.37 (d, *J* = 5.9 Hz, 2H, CH<sub>2</sub>O), 3.51 (s, 2H, CH<sub>2</sub>), 2.93 (m, 2H, 2 CHN), 2.06 (m, 2H, 2 CHN), 1.89 (m, 3H), 1.69 (m, 2H, 2 CH), 1.49 (m, 2H, 2 CH). <sup>13</sup>C NMR (CDCl<sub>3</sub>) δ: 162.9 (d, <sup>1</sup>*J* = 245.3 Hz), 155.6, 141.3 (d, <sup>3</sup>*J* = 7.4 Hz), 136.2, 129.5 (d, <sup>3</sup>*J* = 8.3 Hz), 124.5 (d, <sup>4</sup>*J* = 2.5 Hz), 124.5, 124.3, 119.5, 115.8 (d, <sup>2</sup>*J* = 21.5 Hz), 115.6, 114.5, 113.7 (d, <sup>2</sup>*J* = 21.5 Hz), 113.2, 104.3, 70.3, 62.8, 53.4 (2C), 35.6, 29.1 (2C). LC-MS (ESI): t<sub>R</sub>=8.57min; m/z [M+H]<sup>+</sup>: 396.16.

#### 5-[(1-(4-Fluorobenzyl)piperidin-4-yl)methoxy]pyrrolo[1,2-*a*]thieno[2,3-*e*]pyrazine (**7a**).

Using the same procedure described for **6a** and starting from a mixture of 88 mg (0.31 mmol) of **5a**, 49 μL of 4-fluorobenzyl chloride (0.37 mmol, 1.2 eq), 51 mg of KI (0.31 mmol, 1 eq), 55 mg of K<sub>2</sub>CO<sub>3</sub> (0.40 mmol, 1.3 eq) and 5 mL of DMF, 100 mg of **7a** were obtained as yellow solid (purification: SiO<sub>2</sub>, preparation: CH<sub>2</sub>Cl<sub>2</sub> + Et<sub>3</sub>N (2%), eluent: CH<sub>2</sub>Cl<sub>2</sub>). Yield: 82%. MP: 116°C. IR (cm<sup>-1</sup>): 2937.8, 2796.6, 2758.4, 1603.0, 1583.9, 1521.3, 1508.4, 1494.7, 1422.7, 1335.8, 1301.1, 1220.3, 1152.4, 982.6, 836.9, 732.7. HRMS (m/z): 395.14674 (calc: 395.14554). <sup>1</sup>H NMR (CDCl<sub>3</sub>) δ: 7.40 (d, *J* = 2.9 Hz, 1H), 7.28 (m, 3H), 7.01 (m, 3H), 6.92 (d, *J* = 2.9 Hz, 1H), 6.78 (m, 1H), 4.37 (d, *J* = 5.7 Hz, 2H, CH<sub>2</sub>O), 3.49 (s, 2H, CH<sub>2</sub>N), 2.92 (m, 2H, 2 CHN), 1.95 (m, 5H), 1.48 (m, 2H, 2 CH). <sup>13</sup>C NMR (CDCl<sub>3</sub>) δ: 161.2 (d, <sup>1</sup>*J* = 243.7 Hz), 155.5, 136.2, 134.1, 130.6 (d, <sup>3</sup>*J* = 7.4 Hz, 2C), 124.4, 124.3, 119.5, 115.6, 114.9 (d, <sup>2</sup>*J* = 21.5 Hz, 2C), 114.5, 113.1, 104.3, 70.3, 62.6, 53.2 (2C), 35.6, 29.1 (2C). LC-MS (ESI): t<sub>R</sub>=8.62min; m/z [M+H]<sup>+</sup>: 396.06.

#### 5-[(1-(Pyridin-4-yl)piperidin-4-yl)methoxy]pyrrolo[1,2-*a*]thieno[2,3-*e*]pyrazine (**8a**).

Using the same procedure described for **6a** and starting from a mixture of 69 mg (0.24 mmol) of **5a**, 47 mg of 4-chloromethylpyridine hydrochloride (0.29 mmol, 1.2 eq), 76 mg of K<sub>2</sub>CO<sub>3</sub> (0.55 mmol, 2.3 eq), 40 mg of KI (0.24 mmol, 1 eq) and 5 mL of DMF, 54 mg of **8a** were obtained as a beige solid (purification: SiO<sub>2</sub>, preparation: cyclohexane + Et<sub>3</sub>N (2%), eluent: cyclohexane/AcOEt (4/1)). Yield: 59%. MP: 110°C. IR (cm<sup>-1</sup>): 2936.6, 2800.7, 2761.6, 1601.7, 1582.9, 1521.2, 1493.8, 1421.8, 1300.0, 1149.6, 982.9, 732.5. HRMS (m/z): 378.15045 (calc: 378.15141). <sup>1</sup>H NMR (CDCl<sub>3</sub>) δ: 8.54 (d, *J* = 4.9 Hz, 2H, 2 CH), 7.41 (s, 1H), 7.28 (d, *J* = 4.9 Hz, 2H, 2 CH), 7.26 (d, *J* = 4.9 Hz, 1H), 7.04 (d, *J* = 4.9 Hz, 1H), 6.90 (d, *J* = 3.9 Hz, 1H), 6.78 (m, 1H), 4.38 (d, *J* = 6.8 Hz, 2H, CH<sub>2</sub>O), 3.52 (s, 2H, CH<sub>2</sub>), 2.91 (m, 2H, 2 CHN), 2.09 (m, 2H, 2 CHN), 1.94 (m, 3H), 1.49 (m, 2H, 2 CH). <sup>13</sup>C NMR (CDCl<sub>3</sub>) δ: 155.5, 149.7, 148.0, 136.2, 124.4 (2C), 124.3, 123.8 (2C), 119.5, 115.7, 114.5, 113.2, 104.3, 70.2, 62.1, 53.5 (2C), 35.5, 29.1 (2C). LC-MS (ESI): t<sub>R</sub> = 7.18min; m/z [M+H]<sup>+</sup>: 379.19.

#### 5-[(1-(Methylbenzyl)piperidin-4-yl)methoxy]pyrrolo[1,2-*a*]thieno[2,3-*e*]pyrazine (**9a**).

Using the same procedure described for **6a** and starting from a mixture of 78 mg (0.27 mmol) of **5a**, 45 μL of (1-bromoethyl)benzene (0.33 mmol, 1.2 eq), 49 mg of K<sub>2</sub>CO<sub>3</sub> (0.55 mmol, 2.3 eq), and 5 mL of DMF, 70 mg of **9a** were obtained as a colourless oil (purification: SiO<sub>2</sub>, preparation: cyclohexane + Et<sub>3</sub>N (2%), eluent: cyclohexane/AcOEt (1/1)). Yield: 66%. IR (cm<sup>-1</sup>): 2928.1, 2797.8, 1697.2, 1521.2, 1493.5, 1422.3, 1356.2, 1334.2, 1300.4, 1149.9, 731.9, 701.4. HRMS (m/z): 391.17099 (calc: 391.17182). <sup>1</sup>H NMR (CDCl<sub>3</sub>) δ: 7.39 (s, 1H), 7.31 (m, 4H), 7.02 (d, *J* = 5.9 Hz, 1H), 6.89 (d, *J* = 3.9 Hz, 1H), 6.77 (m, 1H), 4.34 (d, *J* = 5.9 Hz, 2H, CH<sub>2</sub>O), 3.45 (qd, *J* = 6.8 Hz, 1H, CH), 3.11 (m, 1H, 1 CHN), 2.87 (m, 1H, 1 CHN), 2.05 (m, 1H, CH), 1.99 – 1.48 (m, 6H), 1.40 (d, *J* = 6.8 Hz, 3H, CH<sub>3</sub>). <sup>13</sup>C NMR (CDCl<sub>3</sub>) δ: 155.6, 143.7, 136.2, 128.1 (2C), 127.7 (2C), 126.7, 124.5, 124.3, 119.5, 115.6, 114.5, 113.1, 104.3, 70.4, 64.9; 50.5, 50.3, 35.8, 29.4, 29.3, 26.9. LC-MS (ESI): t<sub>R</sub>=8.58min; m/z [M+H]<sup>+</sup>: 392.19.

**5-[(1-(Ethylphenyl)piperidin-4-yl)methoxy]pyrrolo[1,2-*a*]thieno[2,3-*e*]pyrazine (10a).**

Using the same procedure described for **6a** and starting from a mixture of 68 mg (0.24 mmol) of **5a**, 26  $\mu$ L of phenethyl chloride (0.28 mmol, 1.2 eq), 39 mg of KI (0.24 mmol, 1 eq), 43 mg of  $K_2CO_3$  (0.31 mmol, 1.3 eq) and 5 mL of DMF, 37 mg of **10a** were obtained as a colourless oil (purification:  $SiO_2$ , preparation:  $CH_2Cl_2$ , gradient: from  $CH_2Cl_2$  to  $CH_2Cl_2/AcOEt$  (1/4)). Yield: 37%. IR ( $cm^{-1}$ ): 2931.7, 2852.9, 1670.5, 1583.8, 1521.5, 1494.0, 1422.7, 1301.0, 1150.8, 981.3, 732.4, 700.2. HRMS ( $m/z$ ): 391.17182 (calc: 391.17182).  $^1H$  NMR ( $CDCl_3$ )  $\delta$ : 7.41 (d,  $J = 3.0$  Hz, 1H), 7.26 (m, 6H), 7.04 (d,  $J = 5.8$  Hz, 1H), 6.93 (d,  $J = 2.9$  Hz, 1H), 6.79 (m, 1H), 4.39 (d,  $J = 5.8$  Hz, 2H,  $CH_2O$ ), 3.09 (m, 2H, 2 CHN), 2.85 (m, 2H, 2 CHN), 2.62 (m, 2H), 2.09 (m, 2H), 1.95 (m, 3H, 3 CH), 1.55 (m, 2H, 2 CH).  $^{13}C$  NMR ( $CDCl_3$ )  $\delta$ : 155.6, 140.5, 136.2, 128.7 (2C), 128.4 (2C), 126.0, 124.5, 124.4, 119.5, 115.7, 114.5, 113.2, 104.3, 70.3, 61.0, 53.5 (2C), 35.7, 33.8, 29.2 (2C). LC-MS (ESI):  $t_R=8.73$ min;  $m/z$   $[M+H]^+$ : 392.13.

**5-[(1-(Propylphenyl)piperidin-4-yl)methoxy]pyrrolo[1,2-*a*]thieno[2,3-*e*]pyrazine (11a).**

Using the same procedure described for **6a** and starting from a mixture of 68 mg (0.24 mmol) of **5a**, 26  $\mu$ L of methylcyclopropyl chloride (0.28 mmol, 1.2 eq), 39 mg of KI (0.24 mmol, 1 eq), 43 mg of  $K_2CO_3$  (0.31 mmol, 1.3 eq) and 5 mL of DMF, 37 mg of **11a** were obtained as a colourless oil (purification:  $SiO_2$ , preparation:  $CH_2Cl_2$ , gradient: from  $CH_2Cl_2$  to  $CH_2Cl_2/AcOEt$  (1/4)). Yield: 46%. IR ( $cm^{-1}$ ): 2937.0, 1521.2, 1494.0, 1422.3, 1354.6, 1334.9, 1150.4, 982.4, 732.2, 700.0. HRMS ( $m/z$ ): 405.18691 (calc: 405.18746).  $^1H$  NMR ( $CDCl_3$ )  $\delta$ : 7.40 (s, 1H), 7.27 (m, 2H), 7.18 (m, 4H), 7.03 (d,  $J = 5.9$  Hz, 1H), 6.92 (d,  $J = 3.9$  Hz, 1H), 6.78 (m, 1H), 4.37 (d,  $J = 6.8$  Hz, 2H,  $CH_2O$ ), 3.99 (m, 2H, 2 CHN), 2.64 (t,  $J = 7.8$  Hz, 2H), 2.40 (m, 2H, 2 CHN), 1.94 (m, 7H), 1.50 (m, 2H, 2 CH).  $^{13}C$  NMR ( $CDCl_3$ )  $\delta$ : 155.6, 142.2, 136.2, 128.4 (2C), 128.3 (2C), 125.7, 124.5, 124.4, 119.5, 115.6, 114.5, 113.2, 104.3, 70.3, 58.5, 53.5 (2C), 35.7, 33.9, 29.1 (2C), 28.9. LC-MS (ESI):  $t_R=8.87$ min;  $m/z$   $[M+H]^+$ : 405.05.

**5-[(1-Methylcyclopropyl)piperidin-4-yl)methoxy]pyrrolo[1,2-*a*]thieno[2,3-*e*]pyrazine (12a).**

Using the same procedure described for **6a** and starting from a mixture of 68 mg (0.24 mmol) of **5a**, 26  $\mu$ L of methylcyclopropyl chloride (0.28 mmol, 1.2 eq), 39 mg of KI (0.24 mmol, 1 eq), 43 mg of  $K_2CO_3$  (0.31 mmol, 1.3 eq) and 5 mL of DMF, 37 mg of **12a** were obtained as a colourless oil (purification:  $SiO_2$ , preparation:  $CH_2Cl_2 + Et_3N$  (2%), eluent:  $CH_2Cl_2$ ). Yield: 46%. IR ( $cm^{-1}$ ): 2932.9, 2771.9, 1521.5, 1494.0, 1422.8, 1357.4, 1333.9, 1300.4, 1151.5, 984.0, 732.1, 706.8. HRMS ( $m/z$ ): 341.15547 (calc: 341.15616).  $^1H$  NMR ( $CDCl_3$ )  $\delta$ : 7.40 (m, 1H), 7.26 (d,  $J = 5.8$  Hz, 1H), 7.03 (d,  $J = 5.8$  Hz, 1H), 6.92 (d,  $J = 3.9$  Hz, 1H), 6.78 (dd,  $J = 3.9$  Hz,  $J = 2.0$  Hz, 1H), 4.38 (d,  $J = 5.8$  Hz, 2H,  $CH_2O$ ), 3.16 (m, 2H, 2 CHN), 2.30 (d,  $J = 5.9$  Hz, 2H,  $CH_2N$ ), 2.07-1.91 (m, 5H), 1.44 (m, 2H, 2 CH), 0.92 (m, 1H), 0.53 (m, 2H,  $CH_2$ ), 0.12 (m, 2H,  $CH_2$ ).  $^{13}C$  NMR ( $CDCl_3$ )  $\delta$ : 155.5, 136.1, 124.4, 124.3, 119.5, 115.6, 114.5, 113.2, 104.3, 70.1, 63.8, 53.2 (2C), 35.4, 28.6 (2C), 7.9, 4.1 (2C). LC-MS (ESI):  $t_R=8.18$ min;  $m/z$   $[M+H]^+$ : 342.13.

**5-[(1-Methylcyclobutyl)piperidin-4-yl)methoxy]pyrrolo[1,2-*a*]thieno[2,3-*e*]pyrazine (13a).**

Using the same procedure described for **6a** and starting from a mixture of 71 mg (0.25 mmol) of **5a**, 33  $\mu$ L of methylcyclobutyl chloride (0.30 mmol, 1.2 eq), 44 mg of  $K_2CO_3$  (0.32 mmol, 1.3 eq) and 4 mL of DMF, 21 mg of **13a** were obtained as a colourless oil (purification:  $Al_2O_3$ , preparation:  $CH_2Cl_2$ , eluent:  $CH_2Cl_2$  then  $CH_2Cl_2/AcOEt$  (9/1)). Yield: 24%. IR ( $cm^{-1}$ ): 2929.9, 2853.8, 2799.1, 2760.6, 1521.5, 1493.8, 1422.2, 1334.6, 1300.3, 1150.4, 982.3, 731.6. HRMS ( $m/z$ ): 355.17182 (calc: 355.17137).  $^1H$  NMR ( $CDCl_3$ )  $\delta$ : 7.40 (d,  $J = 3.9$  Hz, 1H), 7.26 (m, 1H), 7.03 (d,  $J = 5.8$  Hz, 1H), 6.91 (d,  $J = 3.9$  Hz, 1H), 6.78 (m, 1H), 4.35 (d,  $J = 5.9$  Hz, 2H,  $CH_2O$ ), 2.93 (m, 2H, 2 CHN), 2.56 (m, 1H, CH), 2.43 (d,  $J = 5.9$  Hz, 2H,  $CH_2N$ ), 2.09-1.67 (m, 11H), 1.49 (m, 2H, 2 CH).  $^{13}C$  NMR ( $CDCl_3$ )  $\delta$ : 155.1, 136.0, 124.4, 124.3, 119.3, 115.8, 114.7, 113.3, 104.3, 70.4, 65.7, 53.5 (2C), 35.5, 34.1, 29.7, 29.0, 28.3 (2C), 18.8. LC-MS (ESI):  $t_R=8.46$ min;  $m/z$   $[M+H]^+$ : 356.28.

**5-[(1-Methylcyclopentyl)piperidin-4-yl)methoxy]pyrrolo[1,2-*a*]thieno[2,3-*e*]pyrazine (14a).**

Using the same procedure described for **6a** and starting from a mixture of 67 mg (0.23 mmol) of **5a**, 36  $\mu$ L of methylcyclopentyl iodide (0.28 mmol, 1.2 eq), 42 mg of  $K_2CO_3$  (0.30 mmol, 1.3 eq) and 5 mL of DMF, 55 mg of **14a** were obtained as a colourless oil (purification:  $SiO_2$ , preparation:  $CH_2Cl_2 + Et_3N$  (2%), eluent:  $CH_2Cl_2$  then  $CH_2Cl_2/AcOEt$  (9/1)). Yield: 64%. IR ( $cm^{-1}$ ): 2941.4, 2864.1, 1651.1, 1521.3, 1493.8, 1422.2, 1335.1, 1300.3, 1151.4, 980.9, 732.0. HRMS ( $m/z$ ): 369.18883 (calc: 369.18746).  $^1H$  NMR ( $CDCl_3$ )  $\delta$ : 7.40 (d,  $J = 2.9$  Hz, 1H), 7.26 (d,  $J = 5.8$  Hz, 1H), 7.03 (d,  $J = 5.8$  Hz, 1H), 6.92 (d,  $J = 5.8$  Hz, 1H), 6.78 (m, 1H), 4.36 (d,  $J = 6.8$  Hz, 2H,  $CH_2O$ ), 2.98 (m, 2H, 2 CHN), 2.30 (d,  $J = 5.8$  Hz, 2H,  $CH_2N$ ), 2.12-1.49 (m, 14H), 1.20 (m, 2H,  $CH_2$ ).  $^{13}C$  NMR ( $CDCl_3$ )  $\delta$ : 155.6, 136.2, 124.5, 124.3, 119.5, 115.6, 114.3, 113.2, 104.3, 70.4, 65.1, 53.8 (2C), 37.4, 35.7, 31.7 (2C), 29.0 (2C), 25.2 (2C). LC-MS (ESI):  $t_R=8.55$ min;  $m/z$   $[M+H]^+$ : 370.26.

**5-[(1-Methylcyclopentyl)piperidin-4-yl)methoxy]-1-methyl pyrrolo[1,2-*a*]thieno[3,2-*e*]pyrazine (14b).**

Using the same procedure described for **6a** and starting from a mixture of 180 mg (0.60 mmol) of **5b**, 93  $\mu$ L of methylcyclopentyl iodide (0.72 mmol, 1.2 eq), 107 mg of  $K_2CO_3$  (0.78 mmol, 1.3 eq) and 6 mL of DMF, 105 mg of **14b** were obtained as a colourless oil (purification:  $SiO_2$ , preparation:  $CH_2Cl_2 + Et_3N$  (2%), eluent:  $CH_2Cl_2$  then  $CH_2Cl_2/AcOEt$  (9/1)). Yield: 46%. IR ( $cm^{-1}$ ): 2942.4, 2863.9, 1582.9, 1587.6, 1529.9, 1516.4, 1488.2, 1462.7, 1428.7, 1349.2, 1301.2, 1230.2, 1165.7, 1127.3, 980.5, 718.0. HRMS ( $m/z$ ): 383.20246 (calc: 383.20246).  $^1H$  NMR ( $CDCl_3$ )  $\delta$ : 7.88 (d,  $J = 2.9$  Hz, 1H), 6.92 (d,  $J = 3.9$  Hz, 1H), 6.76 (s, 1H), 6.73 (m, 1H), 4.35 (d,  $J = 6.8$  Hz,

2H, CH<sub>2</sub>O), 2.97 (m, 2H, 2 CHN), 2.67 (s, 3H, CH<sub>3</sub>), 2.28 (d, *J* = 7.8 Hz, 2H, CH<sub>2</sub>N), 2.11-1.45 (m, 14H), 1.19 (m, 2H, CH<sub>2</sub>). <sup>13</sup>C NMR (CDCl<sub>3</sub>) δ: 154.7, 140.3, 125.2, 122.8, 119.7, 115.1, 114.9, 112.2, 103.6, 70.6, 65.1, 53.8 (2C), 37.5, 35.7, 31.7 (2C), 29.1, 25.2 (2C), 17.3. LC-MS (ESI): t<sub>R</sub>=9.02min; m/z [M+H]<sup>+</sup>: 384.00.

5 **5-[(1-Methylcyclohexyl)piperidin-4-yl)methoxy]pyrrolo[1,2-*a*]thieno[2,3-*e*]pyrazine (15a).**

Using the same procedure described for **6a** and starting from a mixture of 108 mg (0.38 mmol) of **5a**, 63 μL of (bromomethyl)cyclohexane (0.45 mmol, 1.2 eq), 68 mg of K<sub>2</sub>CO<sub>3</sub> (0.49 mmol, 1.3 eq) and 5 mL of DMF, 80 mg of **15a** were obtained as a colourless oil (purification on a spot 2 apparatus, column: EVF SiO<sub>2</sub>, gradient: from CH<sub>2</sub>Cl<sub>2</sub> to CH<sub>2</sub>Cl<sub>2</sub>/AcOEt (2/8)). Yield: 55%. IR (cm<sup>-1</sup>): 2920.7, 2848.8, 1583.1, 1521.3, 1493.7, 1422.2, 1334.7, 1150.8, 983.6, 731.6, 705.1. HRMS (m/z): 383.20349 (calc: 383.20312).  
10 <sup>1</sup>H NMR (CDCl<sub>3</sub>) δ: 7.41 (d, *J* = 3.9 Hz, 1H), 7.27 (d, *J* = 5.8 Hz, 1H), 7.03 (d, *J* = 5.8 Hz, 1H), 6.92 (d, *J* = 3.9 Hz, 1H), 6.78 (m, 1H), 4.36 (d, *J* = 6.8 Hz, 2H, CH<sub>2</sub>O), 2.92 (m, 2H, 2 CHN), 2.12 (d, *J* = 6.8 Hz, 2H, CH<sub>2</sub>N), 1.95-1.17 (m, 16H), 0.87 (m, 2H). <sup>13</sup>C NMR (CDCl<sub>3</sub>) δ: 155.6, 136.2, 124.5, 124.4, 119.5, 115.6, 114.5, 113.1, 104.3, 70.4, 66.2, 54.0 (2C), 35.8, 35.2, 32.1 (2C), 29.1 (2C), 26.8, 26.2 (2C). LC-MS (ESI): t<sub>R</sub>=8.70min; m/z [M+H]<sup>+</sup>: 384.25.

15 **5-[(1-Methylcyclohexyl)piperidin-4-yl)methoxy]-1-methyl pyrrolo[1,2-*a*]thieno[3,2-*e*]pyrazine (15b).**

Using the same procedure described for **6a** and starting from a mixture of 81 mg (0.27 mmol) of **5b**, 45 μL of (bromomethyl)cyclohexane (0.32 mmol, 1.2 eq), 48 mg of K<sub>2</sub>CO<sub>3</sub> (0.35 mmol, 1.3 eq) and 4 mL of DMF, 50 mg of **15b** were obtained as a colourless oil (purification: SiO<sub>2</sub>, preparation: CH<sub>2</sub>Cl<sub>2</sub> + Et<sub>3</sub>N (2%); eluent: CH<sub>2</sub>Cl<sub>2</sub> then CH<sub>2</sub>Cl<sub>2</sub>/AcOEt (9/1)). Yield: 47%. IR (cm<sup>-1</sup>): 2921.5, 2850.1, 1587.5, 1516.1, 1488.1, 1464.3, 1428.4, 1347.6, 1165.5, 1127.0, 983.6, 717.9. HREIMS (m/z [M+H]<sup>+</sup>): 398.2266 (calc: 398.2252).  
20 <sup>1</sup>H NMR (CDCl<sub>3</sub>) δ: 7.87 (d, *J* = 2.9 Hz, 1H), 6.91 (d, *J* = 2.9 Hz, 1H), 6.76 (s, 1H), 6.73 (m, 1H), 4.34 (d, *J* = 6.8 Hz, 2H, CH<sub>2</sub>O), 2.90 (m, 2H, 2 CHN), 2.67 (s, 3H, CH<sub>3</sub>), 2.11 (d, *J* = 6.8 Hz, 1H, CH<sub>2</sub>N), 1.93-1.13 (m, 16H), 0.87 (m, 2H). <sup>13</sup>C NMR (CDCl<sub>3</sub>) δ: 154.7, 140.3, 125.2, 122.8, 119.8, 115.1, 114.9, 112.2, 103.6, 70.6, 66.2, 54.0 (2C), 35.8, 35.2, 32.1 (2C), 29.1 (2C), 26.8, 26.2 (2C), 17.3. LC-MS (ESI): t<sub>R</sub>=9.32min; m/z [M+H]<sup>+</sup>: 398.02.

25 **5-[(1-Benzylpiperidin-4-yl)amino]pyrrolo[1,2-*a*]thieno[2,3-*e*] pyrazine (20a).**

In a microwave vial, 300 mg of compound **3a** (1.44 mmol) are dissolved in 3 mL of *N*-methylpyrrolidinone. 885 μL (4.33 mmol, 3 eq) of 4-amino-1-benzylpiperidine are added to the solution and the mixture is warmed under microwave irradiation at 210°C for 1 hour. The mixture is then diluted in water (50 mL) and extracted with dichloromethane (3 X 40 mL). The organic phase is then washed with water (3 X 50 mL), dried over MgSO<sub>4</sub> and evaporated under reduced pressure. The crude product is then purified by column chromatography  
30 on silica gel (preparation: CH<sub>2</sub>Cl<sub>2</sub> + Et<sub>3</sub>N (2%), eluent: CH<sub>2</sub>Cl<sub>2</sub>) to afford **20a** as a brown oil. Yield: 60%. MP: 95°C. IR (cm<sup>-1</sup>): 3107.7, 3027.7, 2938.5, 2803.1, 2760.6, 1581.0, 1526.1, 1492.0, 1363.7, 1340.0, 1307.1, 1070.2, 734.5, 700.6. HRMS (m/z): 391.17130 (calc: 362.15650). <sup>1</sup>H NMR (CDCl<sub>3</sub>) δ: 7.33-7.25 (m, 6H), 7.20 (d, *J* = 5.8 Hz, 1H), 6.96 (d, *J* = 5.8 Hz, 1H), 6.71 (m, 1H), 6.61 (m, 1H), 4.64 (d, *J* = 7.8 Hz, 1H, NH), 4.23 (m, 1H, 1 CHN), 3.54 (s, 2H, CH<sub>2</sub>N), 2.87 (m, 2H, 2 CHN), 2.25 (m, 2H, 2 CHN), 2.15 (m, 2H, 2 CH), 1.60 (m, 2H, 2 CH). <sup>13</sup>C NMR (CDCl<sub>3</sub>) δ: 148.4, 138.4, 138.2, 129.1 (2C), 128.2 (2C), 127.0, 124.5, 121.1, 119.4, 115.1, 114.3, 112.3,  
35 101.1, 63.1, 52.4 (2C), 47.3, 32.6 (2C). LC-MS (ESI): t<sub>R</sub>=6.49min; m/z [M+H]<sup>+</sup>: 363.22.

**1-Benzyl-*N*-(pyrrolo[1,2-*a*]thieno[2,3-*e*]pyrazin-5-yl) piperidine-4-carboxamide (21a).**

Under Ar, in 2 mL of degassed dioxane are successively added 104 mg (0.5 mmol) of compound **4a**, 131 mg of carboxamide (0.6 mmol, 1.2 eq), 405 mg of Cs<sub>2</sub>CO<sub>3</sub> (1.25 mmol, 2.5 eq), 31 mg of BINAP (0.05 mmol, 10%) and 6 mg of Pd(OAc)<sub>2</sub> (0.025 mmol, 5%). The  
40 mixture is then warmed under Ar at 100°C. After 3h30, the result of the reaction is concentrated under reduced pressure. The residue is then dissolved in CH<sub>2</sub>Cl<sub>2</sub>, washed with water and purified by flash chromatography (SiO<sub>2</sub>, gradient from CH<sub>2</sub>Cl<sub>2</sub> to CH<sub>2</sub>Cl<sub>2</sub>/AcOEt (9/1)) to give **21a** as a brown solid. Yield: 79%. MP: 117°C. IR (cm<sup>-1</sup>): 3416.7 (N-H), 2924.8, 2853.9, 1714.1, 1585.4, 1514.8, 1494.5, 1436.8, 1410.5, 1366.5, 1331.3, 1295.0, 736.9, 699.9. HRMS (m/z): 390.15068 (calc: 390.15141). <sup>1</sup>H NMR (CDCl<sub>3</sub>) δ: 7.81 (s, 1H, NH), 7.50 (s, 1H), 7.34 – 7.28 (m, 6H), 7.10 (d, *J* = 5.3 Hz, 1H), 6.94 (s, 1H), 6.91 (m, 1H), 3.53 (s, 2H, CH<sub>2</sub>N), 2.99 (m, 2H, 2 CHN), 2.11 – 1.93  
45 (m, 7H). <sup>13</sup>C NMR (CDCl<sub>3</sub>) δ: 174.9, 142.9, 138.3, 136.4, 129.0 (2C), 128.2 (2C), 127.0, 126.5, 124.5, 120.7, 116.6, 114.8, 114.3, 106.3, 63.1, 53.0 (2C), 43.4, 28.7 (2C). LC-MS (ESI): t<sub>R</sub>=7.05min; m/z [M+H]<sup>+</sup>: 391.23.

**3. In vitro tests of AChE and buChE biological activity**

Inhibitory capacity of compounds on AChE and BuChE biological activity was evaluated through the use of the spectrometric method of  
50 Ellman.<sup>1</sup> Lyophilized electric eel AChE (Type III, Sigma Aldrich) or equine BuChE (Sigma Aldrich from equine serum) was dissolved in 0.2 M phosphate buffer pH 7.4 such as to have enzyme solutions stock with 2.5 units/mL enzyme activity. Acetyl- or butyrylthiocholine iodide (Sigma Aldrich) was used as a substrate of the enzymatic reaction and 5,5-dithiobis(2-nitrobenzoic) acid (DTNB, Sigma Aldrich) as a label for the measurement of cholinesterase activity. In the procedure, 1880 μL of 0.12 mg/mL DTNB dissolved in phosphate buffer pH 7.4 were mixed with 40 μL of test compound solution and 20 μL of enzyme stock solution were mixed. After 5 min of preincubation,  
55 40 μL of 10 mM acetyl- or butyrylthiocholine iodide solution was added to the assay solution. The change in absorbance at 412 nm was recorded (AGILENT 8453 UV-VIS Spectroscopy System) during 10 min.

First screening of AChE and BuChE activity was carried out at a  $10^{-5}$  M concentration of compounds under study. For the compounds with significant inhibition ( $\geq 80\%$ ) after 4 min of reaction,  $IC_{50}$  values were determined graphically from a 6-point inhibition curves using the Origin software, and expressed as  $IC_{50} \pm SD$ . Donepezil (from Tocris) and tacrine (from Tocris) were used as control respectively.

#### 4. Propidium competition assay

Propidium exhibits an increase in fluorescence on binding to AChE peripheral site, making it a useful probe for competitive ligand binding to the enzyme.<sup>2</sup> Fluorescence was measured in a Tecan Infinite M200 plate reader. Measurements were carried out in 200  $\mu$ L solution volume, in 96-well plates. The buffer used was 1 mM Tris/HCl, pH 8.0, 5 U eeAChE which was incubated, for 15 min at 25°C, with a 150  $\mu$ L  $10^{-5}$ M solution of the compounds or donepezil (from Tocris) as control. One micromolar propidium iodide 50  $\mu$ L solution was added 10 min before fluorescence measurement. The excitation wavelength was 535 nm, and that of emission, 595 nm. Each assay was repeated, at least, three different times.

#### 5. Binding experiments

Binding to native 5-HT<sub>4</sub>R from guinea pig was determined using the method of Grossman.<sup>3</sup> For membrane preparations male guinea pigs (300-350 g, Charles River) were subjected to euthanasia by cervical dislocation and decapitated. Brains were rapidly removed at 4°C and striatal regions carefully dissected and pooled. The tissues were then suspended in 10 volumes of HEPES buffer 50 mM pH 7.4 at 4°C. After homogenization at 4°C (Ultra-Turrax, maximal speed, 15 sec), and ultracentrifugation (23,000 x g, 60 min, 4°C), the pellet was resuspended in 10 volumes of HEPES buffer 50 mM pH 7.4 at 4°C in order to obtain a tissue concentration of about 100 mg protein/mL.

The protein concentration was determined by the method of Lowry<sup>4</sup> using bovine serum albumin as standard.

For radioligand binding studies, 600  $\mu$ g of membrane were incubated in duplicate at 37°C for 30 min with [<sup>3</sup>H]-GR113808 (Perkin Elmer), fixed concentration of compound and HEPES buffer 50 mM pH 7.4 at 37°C. Incubation was terminated by rapid vacuum filtration through 0.5% polyethylenimine-pres soaked Whatman GF/B filters (Alpha Biotech) using a Brandel Cell Harvester. Filters were subsequently washed three times with 4 ml of HEPES buffer 50 mM pH 7.4 at 4°C.

The method was validated from saturation studies: 6 concentrations of [<sup>3</sup>H]-GR113808 were used to give final concentrations of 0.02-0.8 nM, non-specific binding of [<sup>3</sup>H]-GR113808 was defined in the presence of 30  $\mu$ M serotonin to determine the  $K_d$  and the Bmax.

For competition studies, [<sup>3</sup>H]-GR113808 was used to give a final concentration of 0.1 nM. Percentages of inhibition of the binding of [<sup>3</sup>H]-GR113808 were obtained for concentrations of  $10^{-6}$  and  $10^{-8}$  M of the ligands tested. For some of these compounds, affinity constants were calculated from 5-point inhibition curves using the EBDA-Ligand software, and expressed as  $K_i \pm SD$ .

#### 6. Cyclic AMP radioimmunoassay

For measurement of intracellular cyclic AMP accumulation, stably transfected cells were grown to confluence and were incubated with serum-free medium 4 h before the beginning of the assay. Then, the cells were preincubated for 15 min with serum-free medium supplemented with 5 mM theophylline, 10  $\mu$ M pargyline and 1  $\mu$ M GR127935 in CHO cells to block the activity of endogenous 5-HT<sub>1B</sub>R. 5-HT or other serotonergic ligands were then added for an additional 15 min. The reaction was stopped by aspiration of the medium and addition of 500  $\mu$ L of ice-cold ethanol. After 30 min incubation at room temperature, the ethanol fraction was collected and evaporated under vacuum. The pellet was reconstituted and cyclic AMP was quantified using a radioimmunoassay kit (cyclic AMP competitive radioimmunoassay, Immunotech, Marseille, France). Student's t-tests were performed using the QuickTTest software.

#### 7. Membrane preparation and radioligand binding assays

Membrane preparation and radioligand binding assays were performed as previously described.<sup>5</sup> Briefly, cells grown at confluence were washed twice with phosphate-buffered saline (PBS) and centrifuged at 300 x g for 5 min. The resulting pellet was resuspended in 1 mL of ice-cold HEPES buffer (50 mM, pH 7.4) and centrifuged at 40,000 x g for 15 min at 4°C. The final pellet containing intracellular membrane component as well as plasma membranes was resuspended in 1 mL HEPES buffer and protein concentrations were determined by the method of Bradford.<sup>6</sup> Radioligand binding assays were performed in 500  $\mu$ L buffer (50 mM HEPES, pH 7.4) containing 20  $\mu$ L of [<sup>3</sup>H]-GR113808, 50  $\mu$ g of membrane preparation and 20  $\mu$ L of displacing drug. Saturation experiments were performed using [<sup>3</sup>H]-GR113808 at nine concentrations ranging from 0.01 nM to 4 nM. Non-specific binding was measured in the presence of 10  $\mu$ M ML10375 and subtracted from total binding to determine the affinity of [<sup>3</sup>H]-GR113808 for its receptor ( $K_d$ , nM) and the total number of receptors (Bmax fmol mg<sup>-1</sup> protein). At a concentration of [<sup>3</sup>H]-GR113808 corresponding to  $K_d$ , the total radioactivity was >500 d.p.m. and non-specific binding <30% of total binding for the saturation experiment to be considered as valid. Competition assays were performed in the presence of nine concentrations of the displacing ligands ( $10^{-12}$ - $10^{-4}$  M) and a concentration of [<sup>3</sup>H]-GR113808 corresponding to its  $K_d$  for the receptor. Incubations were performed at 25°C for 30 min and the reaction was terminated by rapid filtration through Whatman GF/B filter paper using the Brandel model 48R cell harvester. Radioactivity was measured using a Beckman model LS 6500C liquid scintillation counter. Binding data were analysed by computer-assisted nonlinear regression analysis (Prism; GraphPad Software, San Diego, CA, U.S.A.).

## 8. X-Ray Crystallography

Single crystals of **17a** suitable for X-ray crystallographic analysis were obtained by slow evaporation from dichloromethane. Data for crystal structure analysis were collected at 150 K with a Bruker–Nonius Kappa CCD area detector diffractometer with graphite–monochromatised Mo K $\alpha$  radiation ( $\lambda=0.71073$  Å). The structure was solved using direct methods and refined by full-matrix least-squares analysis on  $F^2$ . Crystallographic data: Crystal size: 0.37×0.24×0.11mm. Formula C<sub>23</sub>H<sub>25</sub>N<sub>3</sub>O<sub>2</sub>S, formula weight 407.53, crystal system monoclinic, space group P2<sub>1</sub>/c,  $a = 18.4455(5)$  Å,  $b = 5.8641(2)$  Å,  $c = 20.5004(6)$  Å,  $\alpha = 90^\circ$ ,  $\beta = 114.067(1)^\circ$ ,  $\gamma = 90^\circ$ ,  $V = 2024.69(11)$  Å<sup>3</sup>,  $Z = 4$ , calculated density = 1.337 g/cm<sup>3</sup>,  $\mu = 0.185$  mm<sup>-1</sup>,  $R_{\text{int}} = 0.037$ ,  $R[F^2 > 2\sigma(F^2)] = 0.040$ ,  $wR(F^2) = 0.095$ . Programme(s) used to solve structure: SHELXS–97. Programme(s) used to refine structure: SHELXL–97. Software used to prepare material for publication: SHELXL–97. Crystallographic data for compound **17a** have been deposited at the Cambridge Crystallographic Data Centre, CCDC N<sup>o</sup> 819449. Copies of this information may be obtained free of charge from the Director, CCDC, 12 Union Road, Cambridge, CB2 1EZ, UK (+44-1223-336408; E-mail: [deposit@ccdc.cam.ac.uk](mailto:deposit@ccdc.cam.ac.uk) or <http://www.ccdc.cam.ac.uk>).

## 9. Computational Procedure.

### 9.1. 5HT<sub>4</sub>R model

First, the sequence of the human 5-HT<sub>4</sub>R was retrieved from the UniProt Knowledgebase (UniProtKB)<sup>7</sup> (ID: Q712M9\_HUMAN). The @tome server<sup>8</sup> (using screening methods like FUGUE,<sup>9</sup> SP3,<sup>10</sup> PSIBLAST,<sup>11,12</sup> HHSEARCH<sup>13</sup>) identified the  $\beta_2$  adrenergic receptor as the best 3D experimental template for the homology modelling of the 5-HT<sub>4</sub>R (Sequence identity = 39%). The high-resolution (2.4 Å) crystal structure of the human  $\beta_2$  adrenergic receptor ( $\beta_2$ AR)-T4 lysozyme fusion protein bound to the carazolol (PDB: 2RH1)<sup>14</sup> was used as the 3D template. The alignment between the two sequences was manually optimised. Disulphide bond: C93-C184 between the transmembrane helix 3 (TM3) and the extracellular loop (ECL2) was conserved. This alignment was used as the basis for the homology modelling with the Modeller software.<sup>15</sup> The resulting model was then evaluated by methods like verify3D<sup>16</sup> and Eval23D.<sup>17</sup>

### 9.2. AChE

The crystal structure of AChE from *Torpedo californica* /Donepezil (E2020)<sup>18</sup> complex (PDB file identifier 1EVE) was used as template to construct the complex models. All water molecules were deleted before the docking runs.

### 9.3. Docking

The docking of the compounds into the two targets was carried out with the GOLD programme (v5.0) using the default parameters.<sup>19,20</sup> This programme applies a genetic algorithm to explore conformational spaces and ligand binding modes and the ChemScore fitness function was used for both docking studies.

The binding site in the 5-HT<sub>4</sub>R model was defined as a 10Å sphere centered on aspartic acid residue Asp<sub>100</sub>. Since the mutagenesis studies showed that the interaction between the positively ionisable amine of ligands and Asp<sub>100</sub> of 5-HT<sub>4</sub>R is crucial for ligand binding, a hydrogen bond constraint between positively ionisable amine ligand and OD of Asp<sub>100</sub> was used during the docking. Furthermore, we required special attention during the docking procedure to some amino acids in the binding site, which were kept flexible: Arg<sub>96</sub>, Thr<sub>97</sub>, Asp<sub>100</sub>, Thr<sub>104</sub>, Tyr<sub>192</sub>, Ser<sub>197</sub>, Trp<sub>272</sub>, Asn<sub>279</sub>, Trp<sub>294</sub>, Tyr<sub>302</sub>.

## References

- Grossman, C. J.; Kilpatrick, G.J.; Bunc, K. T., Development of a radioligand binding assay for 5HT4 receptors in guinea pig and rat brain. *Br. J. Pharmacol.*, 1993, **109**, 618-624.
- T.L. Rosenberry, W.D. Mallender, P.J. Thomas, T. Szegletes, *Chem. Biol. Interact.*, 1999, **119-120**, 85-97.
- G.L. Ellman, K.D. Courtney V. Andres, R.M. Featherstone, *Biochem. Pharmacol.*, 1961, **7**, 88–95.
- O.H. Lowry, N.J. Rosebrought, A.L. Farr, R.J. Randall, *J. Biol. Chem.*, 1951, **193**, 265-275.
- O. Blondel, M. Gastineau, Y. Dahmoune, M. Langlois, R. Fischmeister, *J. Neurochem.*, 1998, **70**, 2252- 2261.
- M.M. Bradford, *Anal. Biochem.*, 1976, **72**, 248-254.
- E. Jain, A. Bairoch, S. Duvaud, I. Phan, N. Redaschi, B.E. Suzek, M.J. Martin, P. McGarvey, E. Gasteiger, *BMC Bioinformatics*, 2009, **10**, 136-155.
- J.L. Pons, G. Labesse, *Nucleic Acids Research*, 2009, **37**, *Web Server issue* W485–W491.
- J. Shi, T.L. Blundell, K. Mizuguchi, K., *J. Mol. Biol.*, 2001, **310**, 243-257.
- H. Zhou, Y. Zhou, *Proteins*, 2005, **58**, 321-328.
- S.F. Altschul, T.L. Madden, A.A. Schäffer, J. Zhang, Z. Zhang, W. Miller, D.J. Lipman, *Nucl. Acids Res.*, 1997, **25**, 3389–3402.
- A.A. Schäffer, L. Aravind, T.L. Madden, S. Shavirin, J.L. Spouge, Y.L. Wolf, E.V. Koonin, S.F. Altschul, S.F., *Nucl. Acids Res.*, 2001, **29**, 2994-3005.
- J. Soding, *Bioinformatics*, 2005, **21**, 951-960.
- V. Lelong, L. Lhonneur, F. Dauphin, M. Boulouard, Naunyn Schmiedebergs *Arch. Pharmacol.*, 2003, **367**, 621-628.
- N. Eswar, D. Eramian, B. Webb, M. Shen, A. Sali, *Methods Mol. Biol.*, 2008, **426**, 145-159.
- D. Eisenberg, R. Lüthy, J.U. Bowie, J.U., *Methods Enzymol.*, 1997, **277**, 396-404.
- J. Gracy, L. Chiche, J. Sallantin, J., *Protein Eng.*, 1993, **6**, 821-829.
- G. Kryger, I. Silman, J.L. Sussman, J. L., *Structure*, 1999, **7**, 297-307.

19 G. Jones, P. Willett, R.C. Glen, *J. Mol. Biol.*, 1995, **245**, 43-53.

20 G. Jones, P. Willett, R.C. Glen, R. A.R. Leach, A. R. Taylor, *J. Mol. Biol.*, 1997, **267**, 727-748.
